# Supplementary material for: Effects of Suramin on Polycystic Kidney Disease in a Mouse Model of Polycystin-1 Deficiency
Source: MDPI journal article supplement (doi:10.3390/ijms23158499), 2022-07-31
Supplement: s1 [file s1]

**Supplementary Table S1.** Effects of suramin on body weight and kidney weight of wild-type and *Pkd1*-miR Tg mice

|                                 | <b>WT+Vehicle<br/>(n=6)</b> | <b>WT+Suramin<br/>(n=8)</b> | <b><i>Pkd1</i>+Vehicle<br/>(n=22)</b> | <b><i>Pkd1</i>+Suramin<br/>(n=20)</b> |
|---------------------------------|-----------------------------|-----------------------------|---------------------------------------|---------------------------------------|
| Gender, F/M                     | 3/3                         | 4/4                         | 10/12                                 | 11/9                                  |
| Body weight (g), M              | 26.9± 2.0                   | 23.0 ± 0.8*                 | 25.1 ±0.5                             | 23.3 ± 0.5*                           |
| Body weight (g), F              | 22.4 ± 0.2                  | 20.9 ± 0.9                  | 21.5 ± 0.3                            | 18.6 ± 0.6**, ###                     |
| Kidney weight (g), M            | 0.35 ± 0.03                 | 0.30± 0.02                  | 0.61 ± 0.02***                        | 0.56± 0.03***                         |
| Kidney weight (g), F            | 0.26 ± 0.00                 | 0.26 ± 0.01                 | 0.45± 0.03**                          | 0.36 ± 0.02 <sup>#</sup>              |
| Kidney-to-body weight ratio (%) | 1.23 ± 0.03                 | 1.29± 0.06                  | 2.28± 0.09***                         | 2.16 ± 0.09***                        |

Values are mean ± SEM. \**P* < 0.05, \*\**P* < 0.01, and \*\*\**P* < 0.001 versus wild-type mice (WT) treated with vehicle; <sup>#</sup>*P* < 0.05, ### *P* < 0.001 versus *Pkd1*-miR Tg mice treated with vehicle.

**Supplementary Table S2.** TaqMan probe ID and primer sequences

| <i>Gene</i>         | <i>Taqman probe or primer sequences (5' to 3')</i> |
|---------------------|----------------------------------------------------|
| <i>Col1a2</i>       | F: AAGGGGTCTTCCTGGTGAAT<br>R: GGGGTACACGTTCTCCTC   |
| <i>Fn1</i>          | F: TGTGACCAGCAACACGGTG<br>R: ACAACAGGAGAGTAGGGCGC  |
| <i>Tgfb1</i>        | F: TCGTCTGCTGAGGCTCAA<br>R: TTGCTGAGGTATCGCCAGGA   |
| <i>Emr1 (F4/80)</i> | Mm00802529_m1                                      |
| <i>Il1b</i>         | Mm00434228_m1                                      |
| <i>Il6</i>          | Mm01210733_m1                                      |
| <i>Mcp1</i>         | Mm00441242_m1                                      |
| <i>Nlrp3</i>        | Mm00840904_m1                                      |
| <i>P2rx7</i>        | Mm00440578_m1                                      |
| <i>P2ry2</i>        | Mm02619978_s1                                      |
| <i>Rn18S</i>        | Mm03928990_g1                                      |
| <i>Tnf</i>          | Mm99999068_m1                                      |

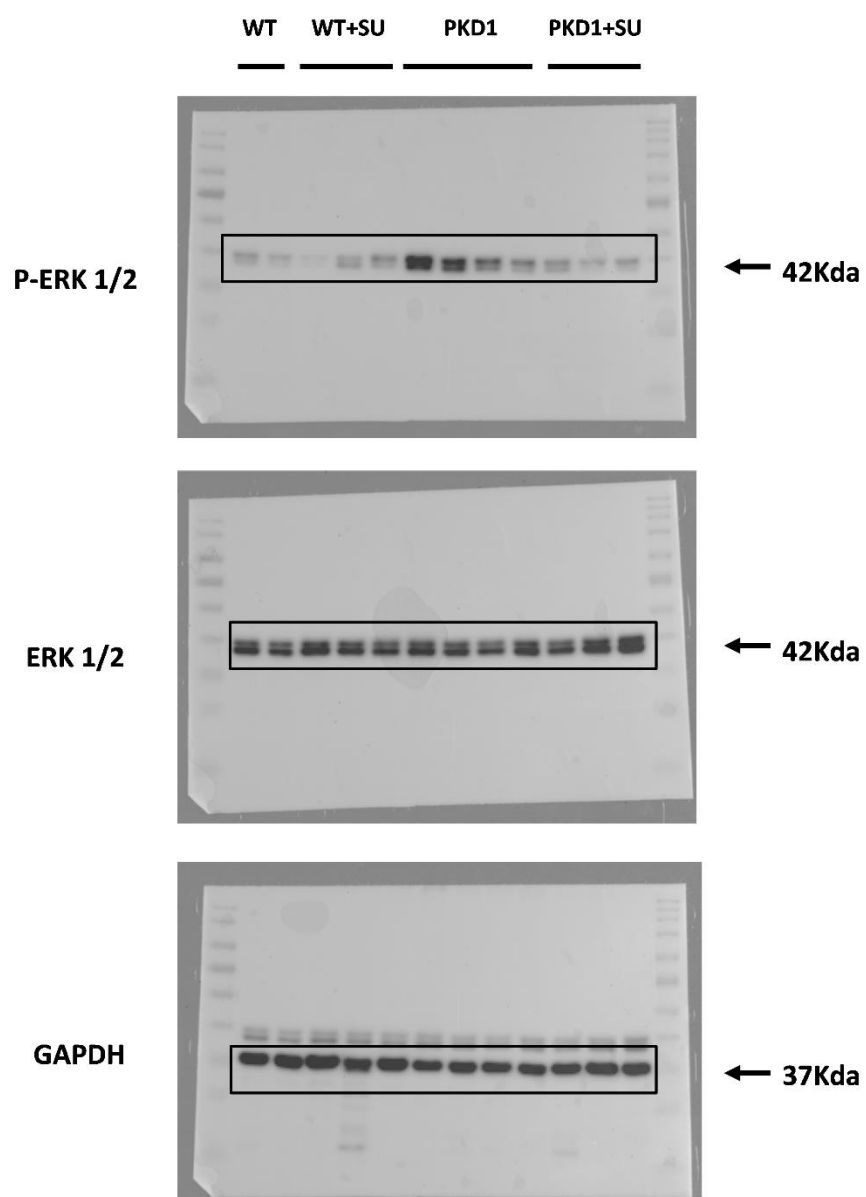

**Supplementary Figure S1.** Uncropped Western blot images of Figure 6.
